1  
2  
3  
4  
5  
6  
7  
8  
9  
10  
11  
12  
13  
14  
15  
16  
17  
18  
19  
20  
21  
22  
23

**The oncometabolite L-2-hydroxyglutarate is a common product of Dipteran larval development**

Nader H. Mahmoudzadeh<sup>1</sup>, Alexander J. Fitt<sup>1</sup>, Daniel B. Schwab<sup>1</sup>, William E. Martenis<sup>1</sup>, Lauren M. Nease<sup>1</sup>, Charity G. Owings<sup>2</sup>, Garrett J. Brinkley<sup>3</sup>, Hongde Li<sup>1</sup>, Jonathan A. Karty<sup>4</sup>, Sunil Sudarshan<sup>3</sup>, Richard W. Hardy<sup>1</sup>, Armin P. Moczek<sup>1</sup>, Christine J. Picard<sup>2</sup>, and Jason M. Tennessen<sup>1,\*</sup>

<sup>1</sup>Department of Biology, Indiana University, Bloomington, IN 47405, USA

<sup>2</sup>Department of Biology, Indiana University–Purdue University Indianapolis, Indianapolis, IN 46202

<sup>3</sup>Department of Urology, University of Alabama at Birmingham, Birmingham, AL

<sup>4</sup>Department of Chemistry, Indiana University, Bloomington, IN 47405, USA

\*Corresponding Author

Email: [jtenness@indiana.edu](mailto:jtenness@indiana.edu)

Tel: 812-855-9803

**Key words:** L-2-hydroxyglutarate; oncometabolite; hypoxia, *Drosophila*

**Running title:** Insects synthesize L-2-hydroxyglutarate

24 **ABSTRACT**

25           The oncometabolite L-2-hydroxyglutarate (L-2HG) is considered an abnormal  
26 product of central carbon metabolism that is capable of disrupting chromatin  
27 architecture, mitochondrial metabolism, and cellular differentiation. Under most  
28 circumstances, mammalian tissues readily dispose of this compound, as aberrant L-  
29 2HG accumulation induces neurometabolic disorders and promotes renal cell  
30 carcinomas. Intriguingly, *Drosophila melanogaster* larvae were recently found to  
31 accumulate high L-2HG levels under normal growth conditions, raising the possibility  
32 that L-2HG plays a unique role in insect metabolism. Here we explore this hypothesis by  
33 analyzing L-2HG levels in 18 insect species. While L-2HG was present at low-to-  
34 moderate levels in most of these species (<100 pmol/mg; comparable to mouse liver),  
35 Dipteran larvae exhibited a tendency to accumulate high L-2HG concentrations (>100  
36 pmol/mg), with the mosquito *Aedes aegypti*, the blow fly *Phormia regina*, and three  
37 representative *Drosophila* species harboring concentrations that exceed 1 nmol/mg –  
38 levels comparable to those measured in mutant mice that are unable to degrade L-2HG.  
39 Overall, our findings suggest that one of the largest groups of animals on earth  
40 commonly generate high concentrations of an oncometabolite during juvenile growth,  
41 hint at a role for L-2HG in the evolution of Dipteran development, and raise the  
42 possibility that L-2HG metabolism could be targeted to restrict the growth of key disease  
43 vectors and agricultural pests.

44

## 45 INTRODUCTION

46           The field of cancer metabolism has become increasingly focused on how small  
47 molecule metabolites regulate cell proliferation and promote cancer progression  
48 (Martinez-Reyes and Chandel, 2020). In this regard, a number of compounds have  
49 emerged as oncometabolites - pro-growth molecules that enhance tumor growth by  
50 interfering with gene expression, epigenetic modifications, mitochondrial physiology,  
51 and signal transduction cascades (Mullen and DeBerardinis, 2012; Yang et al., 2013;  
52 Ye et al., 2018). These compounds, however, are not simply cancer-causing molecules,  
53 but also serve essential roles in normal metabolism and physiology. For example, the  
54 first molecules implicated as oncometabolites were the tricarboxylic acid intermediates  
55 fumarate and succinate (Raimundo et al., 2011), both of which play ancient and  
56 essential roles in energy production. Similarly, the oncometabolite D-2-hydroxyglutarate  
57 (D-2HG), which is perhaps best known for promoting glioblastoma (Ye et al., 2018), also  
58 serves normal metabolic roles in bacteria, yeast, and even humans (Becker-Kettern et  
59 al., 2016; Struys et al., 2005; Zhang et al., 2017). Such examples illustrate how  
60 oncometabolites act in diverse and important metabolic mechanism across all kingdoms  
61 of life and suggest that studying normal oncometabolite function can advance our  
62 understanding of how these molecules induce human disease.

63           Among known oncometabolites, the compound L-2HG stands out as unusual  
64 because eukaryotes lack enzymes dedicated to L-2HG production. Mammalian cells  
65 synthesize L-2HG as a result of promiscuous Lactate Dehydrogenase (Ldh) and Malate  
66 Dehydrogenase (Mdh) activity and degrade this compound via the enzyme L-2HG  
67 dehydrogenase (L2HGDH) (Ye et al., 2018). Most mammalian tissues, with the

68 exception of the mouse testis, maintain low L-2HG concentrations and inappropriate L-  
69 2HG accumulation can induce dramatic changes in epigenetic modifications, central  
70 carbon metabolism, and growth factor signaling (Ma et al., 2017; Teng et al., 2016; Ye  
71 et al., 2018). As a result, nearly all studies of L-2HG focus on the detrimental effects of  
72 this compound in neurological disorders and renal cell carcinoma and the question  
73 remains as to whether L-2HG, like the other oncometabolites, serves a normal  
74 physiological role (Ma et al., 2017; Shim et al., 2014; Ye et al., 2018). In this regard,  
75 several studies have observed that cultured mammalian cells accumulate excess L-  
76 2HG in response to oxidative stress, with hypoxia, acidic pH, and elevated NADH levels  
77 enhancing L-2HG synthesis and accumulation (Intlekofer et al., 2015; Intlekofer et al.,  
78 2017; Mullen et al., 2014; Nadtochiy et al., 2016; Oldham et al., 2015; Reinecke et al.,  
79 2012; Teng et al., 2016). These cell culture studies suggest that L-2HG metabolism  
80 could act as a metabolic signaling molecule that helps cellular physiology adapt to redox  
81 stress; however, the functions of L-2HG function *in vivo*, if any, remain unknown.

82         One of the only examples of a healthy animal accumulating high L-2HG levels in  
83 a regulated and predictable manner is during larval development of the fruit fly  
84 *Drosophila melanogaster* (Li et al., 2017). While the exact reason for why *Drosophila*  
85 *melanogaster* larvae accumulate L-2HG remains to be elucidated, this observation  
86 raises the possibility that L-2HG serves a unique role in insects and suggests that  
87 comparative studies of insect metabolism could illuminate the endogenous function of  
88 this oncometabolite. Towards this goal, we used gas chromatography-mass  
89 spectrometry to quantify L-2HG levels in 18 species of insects. Our analysis revealed  
90 that representative species across the order Diptera seem particularly adept at

91 accumulating very high L-2HG concentrations during larval development. Moreover, we  
92 demonstrate that while Dipteran larvae can generate excess L-2HG in response to  
93 hypoxia, larvae generate high concentrations of this compound regardless of oxygen  
94 concentration. This finding indicates that one of the largest and most diverse animal  
95 orders on the planet commonly produces high concentrations of an oncometabolite in a  
96 developmentally-regulated manner and suggests that further studies of Dipteran L-2HG  
97 metabolism could help elucidate the endogenous functions of this compound. In  
98 addition, our study suggests the L-2HG metabolism serves a unique role in the Dipteran  
99 development, thus raising the possibility that production of this compounds could be  
100 used to control populations of common disease vectors and agricultural pests.

101

102

103

104

105 **METHODS**

106 **Insect Husbandry**

107 *Libellulida* (Odonata, Anisoptera, Libellulidae) species and *Enallagma* (Odonata,  
108 Zygoptera, Coenagrionidae) species.: Nymphs were purchased from Carolina Biological  
109 Supply (*Libellulida* species, 143526; *Enallagma* species, 143520) and maintained  
110 following the supplier's recommendation. For collections, individual nymphs were  
111 removed from the culture, briefly patted dry, placed in a pre-tared 2 mL tube containing  
112 1.4 mm ceramic beads, massed, and flash frozen in liquid nitrogen.

113

114 *Grylloides sigillatus* (Orthoptera, Gryllidae): Nymphs were obtained from Carolina  
115 Biology (item #143558). Upon arrival, cultures were maintained at ambient temperature  
116 and fed a diet of dried dog food, lettuce, and apple slices. All samples contained a  
117 single individual.

118

119 *Oncopeltus fasciatus* (Hemiptera, Lygaeidae): Milkweed bugs were obtained from  
120 Carolina Biological Supply (Item # 143800) and maintained on organic sunflower seeds.

121

122 *Apis mellifera* (Hymenoptera, Apidae): Bee samples were collected from a colony  
123 established and maintained by Dr. Irene Newton's lab at Indiana University-  
124 Bloomington. Samples were collected in 2018 during the months of June, July, and  
125 August. For both larvae and adults, each sample contained an individual animal. Adult  
126 samples consisted of workers.

127

128 *Onthophagus taurus* (Coleoptera, Scarabaeidae): Adults were collected from cow dung  
129 pads at Busselton, Western Australia (-33° 39' 8" S, 115° 20' 43" E) in January 2016  
130 and shipped to Bloomington, IN, for rearing. All beetles were maintained as a single  
131 colony in the laboratory at 24°C on a 16 L : 8 D cycle, and fed homogenized cow dung  
132 *ad libitum* following an established protocol (Moczek et al., 2002). In order to obtain  
133 offspring, beetles were allowed to breed in plastic containers (25 cm tall x 20 cm in  
134 diameter) and filled ~75% with a moist sand:soil mixture. For each round of breeding,  
135 six female and three male beetles were added to one breeding container and  
136 provisioned with ~0.5 L of homogenized cow dung. Beetles were allowed to breed for  
137 one week, at which point they were recaptured and brood balls containing offspring  
138 were collected and placed in plastic containers. All samples contained a single  
139 individual.

140

141 *Tribolium castaneum* (Coleoptera, Tenebrionidae): Cultures were maintained on King  
142 Arthur whole wheat flour supplemented with active dry yeast at 28°C and 55-65%  
143 humidity. For larval analysis, 3<sup>rd</sup> and 4<sup>th</sup> instar larvae were collected. For adult hypoxia  
144 experiment, recently emerged adults were collected and adults were kept on new flour  
145 for the duration of the treatment. The strain *Vermillion*<sup>white</sup> was used for all the studies in  
146 this report.

147

148 *Tenebrio molitor* (Coleoptera, Tenebrionidae): Larvae (~100-200 mg; Item #144274  
149 and ~20 mg; Item #144287) and adults (Item #144270) were purchased from Carolina  
150 Biological Supply and fed whole wheat flour and apple slices, as per the distributors

151 care sheet. All samples contained an individual animal. For larvae of a mass >100 mg,  
152 individual animals were homogenized in 800 µl of methanol extraction buffer as  
153 described below (see *Sample collection and L-2HG Quantification*) and the homogenate  
154 was immediately diluted 1:2 or 1:4 with additional extraction buffer, depending on the  
155 mass of the larvae. All samples contained a single individual.

156

157 *Galleria mellonella* (Lepidoptera, Pyralidae): Larvae were purchased from Carolina  
158 Biological Supply (Item # 143928) and raised on the provided media according to the  
159 distributors care sheet. All samples contained a single individual.

160

161 *Vanessa cardui* (Lepidoptera, Nymphalidae): Larvae were obtained from Carolina  
162 Biology (Item # 144076) and maintained on the culture media provided by the distributor  
163 at ambient temperature. All samples contained a single individual.

164

165 *Manduca sexta* (Lepidoptera, Sphingidae): Larvae were obtained from Carolina  
166 Biological Supply (#143886) and maintained at room temperature on hornworm diet  
167 (Carolina Biological Supply; #143910). Animals were collected throughout the L3 stage.  
168 Each sample consisted of an individual animal. For larvae with a mass greater than 50  
169 mg, individual animals were homogenized in 800 µl of methanol extraction buffer as  
170 described below (see *Sample collection and L-2HG Quantification*) and the homogenate  
171 was immediately diluted 1:2 or 1:4 with additional extraction buffer, depending on the  
172 mass of the larvae.

173



174 *Aedes aegypti* (Diptera, Nematocera, Culicidae): RexD (Puerto Rico) derived Higgs  
175 White Eye (HWE) strain were maintained in an insect incubator (Percival Model I-36VL,  
176 Perry, IA, USA) at 28°C and 75% relative humidity with a 12h:12h light:dark cycle.  
177 Larvae were reared in freshwater (dH<sub>2</sub>O) at a density of 200 larvae/L of water. Water  
178 was changed every other day. Each larval cup was fed a 4:1 mixture of finely ground  
179 fish pellets to baker's yeast a day. Adult mosquitos were fed 10mL of 10% sucrose daily  
180 via cotton balls. Samples contained of 10-20 mg of third instar larvae.

181  
182 *Hermetia illucens* (Diptera, Brachicera, Stratiomyidae): Larval cultures were shipped  
183 from Dr. Jeffery Tomberlin's lab (Texas A&M University; College Station, Texas, United  
184 States) and collected upon arrival. Each sample contained an individual larva. Cultures  
185 were maintained at ambient temperature and adults were collected upon emergence.

186  
187 *Musca domestica* (Diptera, Brachicera, Muscidae): Larvae were purchased from  
188 Carolina Biological Supply (Item #144410) and raised on Instant House Fly Medium  
189 (Item # 144424) at 25°C. Individual larva were collected in a 1.5 ml microfuge tube and  
190 immediately placed on ice. Samples were washed as described for the *Drosophila*  
191 species (see above). All samples contained a single individual.

192  
193 *Drosophila species* (Diptera, Brachycera, Drosophilidae): All *Drosophila* species were  
194 maintained on standard Bloomington *Drosophila* Stock Center (BDSC) media at 25°C.  
195 The *Drosophila melanogaster* strain *w<sup>1118</sup>* was used for all experiments. *Drosophila*  
196 *hydei* and *Drosophila busckii* cultures, which were kindly provided by Dr. Irene Newton's

197 lab (Indiana University-Bloomington, USA), are derived from wild isolates collected in  
198 Brown County, Indiana.

199 For all species, virgin males and females were collected immediately following  
200 eclosion and aged for 3 days on BDSC media prior to collection or treatment. For larval  
201 analyses, embryos were collected on molasses agar with covered with yeast paste as  
202 previously described (Li and Tennessen, 2018). Larvae were allowed to develop for 60  
203 hours (*D. melanogaster* and *D. busckii*) or 84 hours (*D. hydei*) prior to collection. For  
204 hypoxic and hyperoxic treatments, larvae were placed in 35 mm plates with Whatman  
205 filter paper at the bottom that was wetted with 2 ml of phosphate buffer saline (PBS; pH  
206 7.4) and contained approximately 500 mg of yeast paste in the center. Regardless of  
207 treatment or age, larval samples were collected by placing ~20 mg of larvae in a 1.5 ml  
208 microfuge tube on ice. Larvae were washed at least three times using ice-cold PBS to  
209 remove all yeast and debris from the sample. Following the final wash, all PBS was  
210 removed from the sample and the tube was flash frozen in liquid nitrogen.

211  
212 *Phormia regina* (Diptera, Brachicera, Calliphoridae): All flies were collected from a  
213 laboratory colony (> 5 generations) that was generated from wild-caught *P. regina*  
214 (collected from Military Park, Indianapolis, IN, USA) and maintained in a 30 x 30 x 30cm  
215 cage (Bioquip, Rancho Dominguez, CA) within the IUPUI "fly room." The colony was  
216 reared at ~25°C ambient temperature, 60% ambient humidity and 24 hour light and  
217 were provided sugar and water ad libitum. Chicken liver was provided to the colony ~ 1  
218 week post-eclosion for ovary maturation. 2-4 days following ovary maturation, chicken  
219 liver (25g) was provided as the egg oviposition substrate for a period of 4-6

220 hours. Following oviposition, the cup containing the chicken liver and eggs were placed  
221 in a one-quart glass jar half-filled with fine pine shavings (Lanjay Inc., Montreal,  
222 QC). Larvae were allowed to develop under ambient conditions. For sample collection,  
223 an individual third instar larva was placed in a 1.5 ml microfuge tube on ice. Samples  
224 were washed as described for the *Drosophila* species (see above). For adult analysis,  
225 adult flies were randomly collected 3 – 5 days post-emergence from the lab colony.

226

### 227 **Method for Mice Liver Harvest:**

228 Both male and female C57BL/6J mice aged 2-4 months were given normal chow  
229 (Labdiet) ad libitum. For mice starvation, chow was removed in the evening 14 hours  
230 prior to tissue harvest. At time of harvest, mice were anesthetized using isoflourane  
231 (Vetone) and blood was collected. Mice were then euthanized. Tissues were briefly  
232 washed in chilled DPBS (Corning), dried using kimwipes (Kimberly-Clark) and snap  
233 frozen using liquid nitrogen. All animal studies were approved by institutional animal  
234 care and use committee (IACUC).

235

### 236 **Sample collection and L-2HG Quantification**

237 For pooled samples that contained multiple individuals, samples were collected in 1.5  
238 ml microfuge tubes and flash frozen in liquid nitrogen. Prior to homogenization, tubes  
239 were removed from liquid nitrogen, the cap end swiftly pounded against the desktop to  
240 dislodge the sample, and the pellet was transferred into a pre-tared 2 ml screwcap tube  
241 containing 1.4 mm ceramic beads. The sample mass was immediately measured with  
242 an analytical balance, the tube was flash frozen in liquid nitrogen, and samples were

243 stored at -80°C. For samples that contained an individual insect, the animal was  
244 collected and immediately transferred into a pre-tared 2 ml screwcap tube containing  
245 1.4 mm ceramic beads. The sample mass was measured using an analytical balance,  
246 the tube was flash frozen in liquid nitrogen, and samples were stored at -80 °C.

247 Homogenization and metabolite extractions were conducted as previously  
248 described (Li and Tennessen, 2019). Briefly, samples were removed from the -80°C  
249 freezer and placed into a benchtop enzyme cooler pre-chilled to -20°C. 800 µl of pre-  
250 chilled methanol extraction buffer (-20°C; 90% methanol diluted with HPLC-grade water  
251 + 8 µg (RS)-2-Hydroxy-1,5-pentanedioate-2,3,3-d3) was added to individual sample  
252 tubes. Sample were homogenized in an Omni Beadruptor 24. Homogenized samples  
253 were returned to a -20°C benchtop enzyme cooler and incubated in a -20°C freezer for  
254 one hour. Samples were then centrifuged at ~20,000 x g in a refrigerated centrifuge for  
255 5 minutes to pellet insoluble debris. 600 µl of the supernatant was removed and  
256 transferred to a 1.5 ml microfuge tube and dried overnight in a vacuum centrifuge.  
257 Samples were then derivatized using a two-step method involving R-2-butanol and  
258 acetic anhydride.

259 Derivatized samples were injected (1.5 µL, 1:5 split ratio) into an Agilent  
260 GC6890-5973i instrument using a Gerstel MPS autosampler. Separation of compounds  
261 was achieved by gas chromatography (GC) with a Phenomex ZB5-5 MSi column. The  
262 GC was programmed to increase temperature as follows: (1) Inlet temperature was set  
263 to 250 °C and initial temperature was set to 95 °C with a one-minute hold. (2)  
264 Temperature was increased at a rate of 40 °C per minute until it reached 110 °C with a  
265 two-minute hold. (3) Temperature was increased a rate of 5 °C per minute to 250 °C. (4)

266 Temperature was increased at a rate of 25 °C per minute to 330 °C followed by a three-  
267 minute hold. Selected ion monitoring (SIM mode) was programmed to record m/z ion  
268 values 173 for endogenous D-/L-2HG, and 176 for the deuterated D-/L-2HG internal  
269 heavy standard. Concentration in each sample was calculated by comparison to the  
270 internal standard and normalized to the sample mass.

271

## 272 **Hypoxia and Hyperoxia Treatments**

273 For all manipulations of atmospheric oxygen concentration, samples were placed in an  
274 air sealed plexiglass chamber equipped with a pressure release valve that was located  
275 within a 25°C temperature-controlled room. A Sable systems ROXY-4 gas regulator was  
276 used to control oxygen concentration within the chamber. Desired oxygen  
277 concentrations were maintained by the ROXY-4 system by injecting either N<sub>2</sub> or O<sub>2</sub> gas  
278 into the chamber.

279

## 280 **Statistical Analysis**

281 All data analyses were conducted using JMP v. 14. Prior to analysis, variables were  
282 evaluated for normality and homoscedasticity using Shapiro-Wilk and Levene's tests,  
283 respectively. Where these assumptions were met, we used two-tailed pooled t-tests or  
284 ANOVA followed by Tukey-Kramer HSD test to determine differences among treatment  
285 groups. Where these assumptions were not met, we conducted non-parametric  
286 Wilcoxon rank sum or Kruskal-Wallis tests. To compare L-2HG titers across larval insect  
287 species with mouse liver samples (see Fig. 1A), we twice conducted Dunnett's post hoc  
288 test with a Bonferroni adjustment for multiple comparisons.

## 289 RESULTS AND DISCUSSION

290 Recent findings that *D. melanogaster* larvae accumulate high L-2HG levels  
291 motivated us to determine if this molecule is abundant in other insects. Towards this  
292 goal, we used a chiral derivatization method coupled with gas chromatography-mass  
293 spectrometry (GC-MS) to quantify L-2HG levels in a diversity of insect species and  
294 mouse liver, which is known to possess low L-2HG levels and served as a baseline  
295 control (Ma et al., 2017). Among those animals and developmental stages surveyed, we  
296 observed no significant difference in L-2HG levels between mouse liver and any adult  
297 insect (Figure 1A). Similarly, L-2HG levels were present at a low level in nymphal  
298 stages of four hemimetabolous species (i.e., insects that do not undergo complete  
299 metamorphosis; Figure 1B) and larval stages of holometabolous species including the  
300 European honey bee (*Apis mellifera*), three species of Coleoptera (beetles, *Tribolium*  
301 *castanaeum*, *Tenebrio molitor*, and *Onthophagus taurus*), and two Lepidopteran (moths  
302 and butterflies) species (*Vanessa cardui* and *Galleria mellonella*). Meanwhile, third  
303 instar larvae of the moth *Manduca sexta* accumulated L-2HG levels that were slightly,  
304 but significantly, higher than mouse liver (Figure 1B) – a result that was observed  
305 throughout the entire third instar, independent of body mass (Figure S1).

306 In contrast to these insects, a majority of the Dipteran species examined  
307 harbored notably elevated larval L-2HG levels, with the mosquito *Aedes aegypti*, the  
308 blow fly *Phormia regina*, and multiple members of genus *Drosophila* (*D. melanogaster*,  
309 *D. busckii*, and *D. hydei*) accumulating L-2HG levels that exceeded 1 nmol/mg. These  
310 L-2HG concentrations are comparable to those measured in both humans and mice  
311 lacking the enzyme L-2-hydroxyglutarate dehydrogenase, which is responsible for

312 degrading L-2HG (Ma et al., 2017; Rzem et al., 2004). In fact, of the seven Dipteran  
313 species examined in this study, only the house fly, *Musca domestica*, maintained larval  
314 L-2HG levels that were not significantly higher than those observed in mouse liver  
315 tissue (Figure 1B); however, we note that even these *M. domestica* samples contained  
316 an average of >100 pmol/mg. Overall, our observations suggest that Dipterans exhibit a  
317 unique tendency to accumulate L-2HG during larval development.

318 Dipteran larvae develop in moist environments. Since human cells accumulate L-  
319 2HG in response to hypoxia and decreased electron transport chain activity (Intlekofer  
320 et al., 2015; Mullen et al., 2014; Oldham et al., 2015), we examined the possibility that  
321 the Dipteran species analyzed herein accumulate high L-2HG levels as the result of  
322 growing within a potentially hypoxic environment (e.g., yeast paste, water, and rotting  
323 chicken liver). To test this hypothesis, we first determined if hypoxia is capable of  
324 inducing L-2HG accumulation in adult males of these species, which normally harbor  
325 low L-2HG levels (Figure 1A). Consistent with studies of mammalian cells, adult male  
326 *Aedes aegypti*, *Drosophila melanogaster*, *Drosophila hydei*, and *Phormia regina*  
327 accumulated excess L-2HG when exposed to 1% O<sub>2</sub> (~1 kPa O<sub>2</sub>) for 6 hours (Figure  
328 2A). We observed a similar phenomenon in third instar larvae of these same species  
329 where a 6 hour exposure to 1% O<sub>2</sub> (an O<sub>2</sub> level that is incompatible with *Drosophila*  
330 *melanogaster* larval development, Zhou et al., 2008) generated significantly higher L-  
331 2HG levels than normoxic controls (~20 kPa O<sub>2</sub>; Figure 2B). In fact, several individual  
332 blowfly larvae harbored L-2HG concentrations that exceeded 6 nmol/mg, which are  
333 among the highest levels ever recorded in animal tissues, even exceeding the L-2HG  
334 levels observed in *L2hgdh* mutant mouse brains and testis (Ma et al., 2017). These

335 observations demonstrate that, similar to mammalian cells, Dipterans appear capable of  
336 accumulating L-2HG in response to hypoxia and are consistent with recent observations  
337 that *Drosophila melanogaster* generates L-2HG in response to artificially induce  
338 mitochondrial stress (Hunt et al., 2019).

339 Our findings that a low oxygen environment results in elevated L-2HG levels  
340 raises the question as to whether the high L-2HG concentrations observed in Dipteran  
341 larvae is simply the result of transient exposure to hypoxia. We tested this possibility by  
342 measuring L-2HG levels in larvae following a 24-hour exposure to mild hypoxia (5%, an  
343 O<sub>2</sub> level that delays, but does not arrest larval development, Zhou et al., 2008),  
344 normoxia, or hyperoxia (30% O<sub>2</sub>, 50% O<sub>2</sub>). If the high L-2HG levels observed in these  
345 larvae simply result of hypoxic stress, we would expect that L-2HG levels would  
346 inversely correlated with O<sub>2</sub> concentration. Instead, we observe that species-specific L-  
347 2HG concentrations remained largely unchanged following 24-hour exposure to any of  
348 these four oxygen concentrations (Figure 3), suggesting that oxygen availability is not  
349 the primary driving force behind L-2HG accumulation in these animals. Moreover, our  
350 finding that 1 % O<sub>2</sub>, but not 5 % O<sub>2</sub>, induces excess L-2HG accumulation supports  
351 previous observations in *Drosophila melanogaster* that larvae mount different  
352 physiological responses depending on the severity of hypoxic conditions (Lavista-Llanos  
353 et al., 2002).

354 Overall, our results demonstrate that several Dipteran species accumulate high  
355 levels of the oncometabolite L-2HG during normal larval development. While the  
356 endogenous functions of L-2HG within these insects remains to be elucidated, our  
357 observations raise important considerations. Insects are among the most diverse



358 groups of animals on the planet, display complex life histories, and are adaptable to a  
359 wide-range of environmental conditions. When considered in this context, our survey of  
360 L-2HG metabolism is small in both the number of species and life-stages surveyed.  
361 Despite this limitation, we uncovered several instances where larvae generated  
362 relatively high L-2HG concentrations - a result which implies that this compound is not  
363 simply an oncometabolite or a waste product of the TCA cycle, but rather accumulates  
364 during normal development of a potentially large number of animal species.

365         The amount of L-2HG found within Dipteran larvae is striking, as similar L-2HG  
366 concentrations in mammals are associated with severe neurometabolic defects and  
367 renal tumors (Shim et al., 2014; Ye et al., 2018), suggesting that this compound serves  
368 a unique role in Dipteran physiology when compared to other animals. One explanation  
369 for our observations is that developmentally regulated L-2HG accumulation acts as part  
370 of a metabolic program that protects Dipteran larvae from transient exposure to extreme  
371 hypoxia. L-2HG has been repeatedly observed to be produced in animal cells exposed  
372 to hypoxic conditions and the production of this molecule is thought to play a role in the  
373 cellular hypoxia response. Moreover, Dipteran larvae have evolved to be exceptionally  
374 tolerant of hypoxia and anoxia, as evident by the ability of *D. melanogaster* larvae to  
375 remain motile for over 30 minutes under anoxic conditions (Callier et al., 2015). Based  
376 on these observations, we propose that L-2HG accumulation helps Dipteran  
377 development survive transient exposure to hypoxic conditions that may be common in  
378 the larval environment.

379         Our findings also raise the question as to how the Dipteran species analyzed in  
380 this study have evolved to tolerate such high L-2HG levels. L-2HG is a potent inhibitor

381 of enzymes that use  $\alpha$ -ketoglutarate ( $\alpha$ -KG) as a substrate and high concentrations of  
382 this molecule interfere with a diversity of  $\alpha$ -KG-dependent processes, which include  
383 mitochondrial metabolism, the removal of methyl groups for DNA and histones, and  
384 stabilization of the transcription factor HIF1 $\alpha$ . Considering that the L-2HG concentration  
385 observed in *Aedes aegypti*, *Phormia regina*, and the three *Drosophila* species used in  
386 this study exceeds all previous reported  $K_i$  values for  $\alpha$ -KG-dependent enzymes, the  
387 cellular physiology of these systems must be uniquely adapted to the presence of this  
388 oncometabolite. Future studies should examine how Dipterans have evolved to tolerate  
389 concentrations of this compound that would prove fatal to humans.

390 The precise endogenous L-2HG functions notwithstanding, our study highlights  
391 how the natural diversity of insects remains a remarkable resource for discovering and  
392 exploring the metabolic mechanisms that support animal growth. In addition, these  
393 findings demonstrate how studying Dipteran development can identify unique metabolic  
394 features that could be targeted for controlling both agricultural pests and human disease  
395 vectors.

396

## 397 **ACKNOWLEDGEMENTS**

398 We thank the Newton, Zelhof, and Tomberlin labs for providing for samples and advice.

399 S.S. is supported by NCI R01CA200653. G.B. is supported by NCI F30CA232397.

400 A.P.M. is supported by NSF 1901680. J.A.K. and JMT are supported by NSF 1726633.

401 J.M.T. is supported by NIH 1R35GM119557.

402 **FIGURE LEGENDS**

403 **Figure 1. Dipteran larvae accumulate high L-2HG levels.** L-2HG levels were  
404 measured in (A) adult insects, (B) juvenile insects, and (A,B) mouse liver, which served  
405 as a baseline control. Asterisks indicate that L-2HG levels are significantly higher than  
406 those measured in mouse liver. Data are presented in scatter plots with mean  $\pm$  SD.  
407 \*P<0.05; \*\*\*P<0.001. See Supplemental Methods for a description of the statistical  
408 analysis.

409

410 **Figure 2. Dipteran insects accumulate L-2HG in response to hypoxia.** L-2HG  
411 levels were measured in select Dipteran (A) adults or (B) larvae following a 6-hour  
412 incubation in the presence of 1% O<sub>2</sub>. Data are presented in scatter plots with mean  $\pm$   
413 SD. \*\*\*P<0.001. See Supplemental Methods for a description of the statistical analysis.

414

415 **Figure 3. Larval L-2HG levels do not change in response to mild hypoxia or**  
416 **hyperoxia.** L-2HG levels were measured in select Dipteran larvae following a 24-hour  
417 incubation in the presence of 5%, 21%, 30% or 50% O<sub>2</sub>. Data are presented in scatter  
418 plots with mean  $\pm$  SD. \*\*P<0.01; See Supplemental Methods for a description of the  
419 statistical analysis.

420

421 **LITERATURE CITED**

- 422 **Becker-Kettern, J., Paczia, N., Conrotte, J. F., Kay, D. P., Guignard, C., Jung, P. P. and**  
423 **Linster, C. L.** (2016). *Saccharomyces cerevisiae* Forms D-2-Hydroxyglutarate and  
424 Couples Its Degradation to D-Lactate Formation via a Cytosolic Transhydrogenase. *J*  
425 *Biol Chem* **291**, 6036-6058.
- 426 **Callier, V., Hand, S. C., Campbell, J. B., Biddulph, T. and Harrison, J. F.** (2015).  
427 Developmental changes in hypoxic exposure and responses to anoxia in *Drosophila*  
428 *melanogaster*. *J Exp Biol* **218**, 2927-2934.
- 429 **Hunt, R. J., Granat, L., McElroy, G. S., Ranganathan, R., Chandel, N. S. and Bateman, J.**  
430 **M.** (2019). Mitochondrial stress causes neuronal dysfunction via an ATF4-dependent  
431 increase in L-2-hydroxyglutarate. *J Cell Biol* **218**, 4007-4016.
- 432 **Intlekofer, A. M., Dematteo, R. G., Venneti, S., Finley, L. W., Lu, C., Judkins, A. R.,**  
433 **Rustenburg, A. S., Grinaway, P. B., Chodera, J. D., Cross, J. R., et al.** (2015).  
434 Hypoxia Induces Production of L-2-Hydroxyglutarate. *Cell Metabolism*.
- 435 **Intlekofer, A. M., Wang, B., Liu, H., Shah, H., Carmona-Fontaine, C., Rustenburg, A. S.,**  
436 **Salah, S., Gunner, M. R., Chodera, J. D., Cross, J. R., et al.** (2017). L-2-  
437 Hydroxyglutarate production arises from noncanonical enzyme function at acidic pH.  
438 *Nature chemical biology* **13**, 494-500.
- 439 **Lavista-Llanos, S., Centanin, L., Irisarri, M., Russo, D. M., Gleadle, J. M., Bocca, S. N.,**  
440 **Muzzopappa, M., Ratcliffe, P. J. and Wappner, P.** (2002). Control of the hypoxic  
441 response in *Drosophila melanogaster* by the basic helix-loop-helix PAS protein similar.  
442 *Mol Cell Biol* **22**, 6842-6853.
- 443 **Li, H., Chawla, G., Hurlburt, A. J., Sterrett, M. C., Zaslaver, O., Cox, J., Karty, J. A.,**  
444 **Rosebrock, A. P., Caudy, A. A. and Tennessen, J. M.** (2017). *Drosophila* larvae  
445 synthesize the putative oncometabolite L-2-hydroxyglutarate during normal  
446 developmental growth. *Proc Natl Acad Sci U S A* **114**, 1353-1358.
- 447 **Li, H. and Tennessen, J. M.** (2018). Preparation of *Drosophila* Larval Samples for Gas  
448 Chromatography-Mass Spectrometry (GC-MS)-based Metabolomics. *J Vis Exp*.
- 449 ---- (2019). Quantification of D- and L-2-Hydroxyglutarate in *Drosophila melanogaster* Tissue  
450 Samples Using Gas Chromatography-Mass Spectrometry. *Methods Mol Biol* **1978**, 155-  
451 165.
- 452 **Ma, S., Sun, R., Jiang, B., Gao, J., Deng, W., Liu, P., He, R., Cui, J., Ji, M., Yi, W., et al.**  
453 (2017). L2hgdh Deficiency Accumulates l-2-Hydroxyglutarate with Progressive  
454 Leukoencephalopathy and Neurodegeneration. *Mol Cell Biol* **37**.
- 455 **Martinez-Reyes, I. and Chandel, N. S.** (2020). Mitochondrial TCA cycle metabolites control  
456 physiology and disease. *Nat Commun* **11**, 102.
- 457 **Moczek, A. P., Hunt, J., Emlen, D. J. and Simmons, L. W.** (2002). Threshold evolution in  
458 exotic populations of a polyphenic beetle. *Evol Ecol Res* **4**, 587-601.
- 459 **Mullen, A. R. and DeBerardinis, R. J.** (2012). Genetically-defined metabolic reprogramming  
460 in cancer. *Trends Endocrinol Metab* **23**, 552-559.
- 461 **Mullen, A. R., Hu, Z., Shi, X., Jiang, L., Boroughs, L. K., Kovacs, Z., Boriack, R., Rakheja,**  
462 **D., Sullivan, L. B., Linehan, W. M., et al.** (2014). Oxidation of alpha-ketoglutarate is  
463 required for reductive carboxylation in cancer cells with mitochondrial defects. *Cell Rep*  
464 **7**, 1679-1690.

- 465 **Nadtochiy, S. M., Schafer, X., Fu, D., Nehrke, K., Munger, J. and Brookes, P. S. (2016).**  
466 Acidic pH Is a Metabolic Switch for 2-Hydroxyglutarate Generation and Signaling. *J*  
467 *Biol Chem* **291**, 20188-20197.
- 468 **Oldham, W. M., Clish, C. B., Yang, Y. and Loscalzo, J. (2015).** Hypoxia-Mediated Increases  
469 in l-2-hydroxyglutarate Coordinate the Metabolic Response to Reductive Stress. *Cell*  
470 *Metab.*
- 471 **Raimundo, N., Baysal, B. E. and Shadel, G. S. (2011).** Revisiting the TCA cycle: signaling to  
472 tumor formation. *Trends Mol Med* **17**, 641-649.
- 473 **Reinecke, C. J., Koekemoer, G., van der Westhuizen, F. H., Louw, R., Lindequie, J. Z.,**  
474 **Mienie, L. J. and Smuts, I. (2012).** Metabolomics of urinary organic acids in respiratory  
475 chain deficiencies in children. *Metabolomics* **8**, 264-283.
- 476 **Rzem, R., Veiga-da-Cunha, M., Noel, G., Goffette, S., Nassogne, M. C., Tabarki, B.,**  
477 **Scholler, C., Marquardt, T., Vikkula, M. and Van Schaftingen, E. (2004).** A gene  
478 encoding a putative FAD-dependent L-2-hydroxyglutarate dehydrogenase is mutated in  
479 L-2-hydroxyglutaric aciduria. *Proc Natl Acad Sci U S A* **101**, 16849-16854.
- 480 **Shim, E. H., Livi, C. B., Rakheja, D., Tan, J., Benson, D., Parekh, V., Kho, E. Y., Ghosh, A.**  
481 **P., Kirkman, R., Velu, S., et al. (2014).** L-2-Hydroxyglutarate: an epigenetic modifier  
482 and putative oncometabolite in renal cancer. *Cancer Discov* **4**, 1290-1298.
- 483 **Struys, E. A., Verhoeven, N. M., Ten Brink, H. J., Wickenhagen, W. V., Gibson, K. M. and**  
484 **Jakobs, C. (2005).** Kinetic characterization of human hydroxyacid-oxoacid  
485 transhydrogenase: relevance to D-2-hydroxyglutaric and gamma-hydroxybutyric  
486 acidurias. *J Inherit Metab Dis* **28**, 921-930.
- 487 **Teng, X., Emmett, M. J., Lazar, M. A., Goldberg, E. and Rabinowitz, J. D. (2016).** Lactate  
488 Dehydrogenase C Produces S-2-Hydroxyglutarate in Mouse Testis. *ACS Chem Biol* **11**,  
489 2420-2427.
- 490 **Yang, M., Soga, T. and Pollard, P. J. (2013).** Oncometabolites: linking altered metabolism  
491 with cancer. *J Clin Invest* **123**, 3652-3658.
- 492 **Ye, D., Guan, K. L. and Xiong, Y. (2018).** Metabolism, Activity, and Targeting of D- and L-2-  
493 Hydroxyglutarates. *Trends Cancer* **4**, 151-165.
- 494 **Zhang, W., Zhang, M., Gao, C., Zhang, Y., Ge, Y., Guo, S., Guo, X., Zhou, Z., Liu, Q.,**  
495 **Zhang, Y., et al. (2017).** Coupling between d-3-phosphoglycerate dehydrogenase and d-  
496 2-hydroxyglutarate dehydrogenase drives bacterial l-serine synthesis. *Proc Natl Acad Sci*  
497 *U S A* **114**, E7574-E7582.
- 498 **Zhou, D., Xue, J., Lai, J. C., Schork, N. J., White, K. P. and Haddad, G. G. (2008).**  
499 Mechanisms underlying hypoxia tolerance in *Drosophila melanogaster*: hairy as a  
500 metabolic switch. *PLoS Genet* **4**, e1000221.

503 **Supplemental Figure Legend**

504

505 **Figure S1. Concentration of L-2HG relative to body mass in *M. sexta* third instar**  
506 **larvae.** Data are presented as a scatter plot. Each data point represents an individual  
507 larva. Dashed lines represent the 95% confidence interval.

508

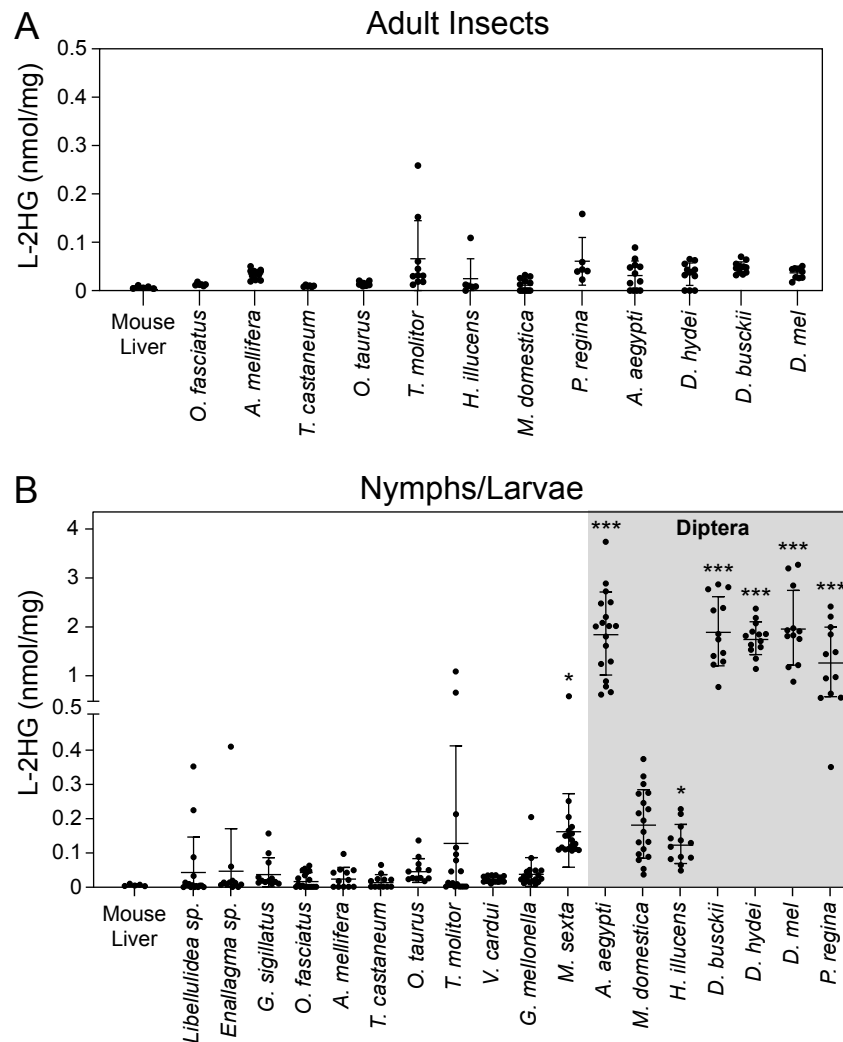

**Figure 1. Dipteran larvae accumulate high L-2HG levels.** L-2HG levels were measured in (A) adult insects, (B) juvenile insects, and (A,B) mouse liver, which served as a baseline control. Asterisks indicate that L-2HG levels are significantly higher than those measured in mouse liver. Data are presented in scatter plots with mean  $\pm$  SD. \* $P < 0.05$ ; \*\*\* $P < 0.001$ . See Supplemental Methods for a description of the statistical analysis.

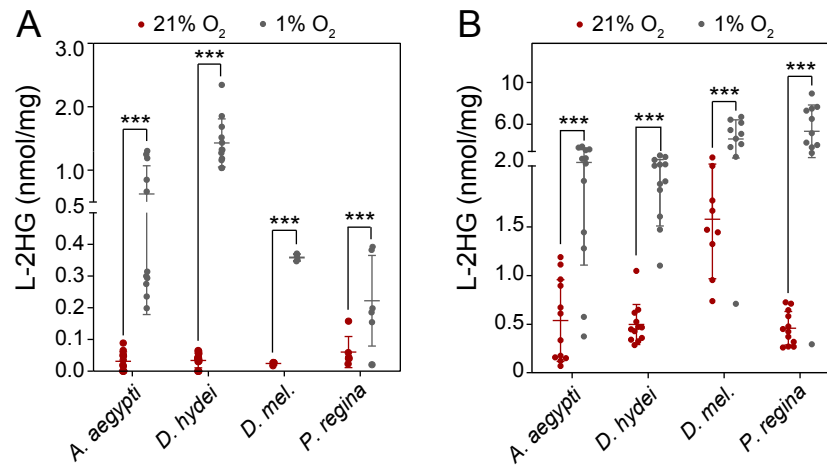

**Figure 2. Dipteran insects accumulate L-2HG in response to hypoxia.** L-2HG levels were measured in select Dipteran (A) adults or (B) larvae following a 6-hour incubation in the presence of 1% O<sub>2</sub>. Data are presented in scatter plots with mean ± SD. \*\*\*P<0.001. See Supplemental Methods for a description of the statistical analysis.



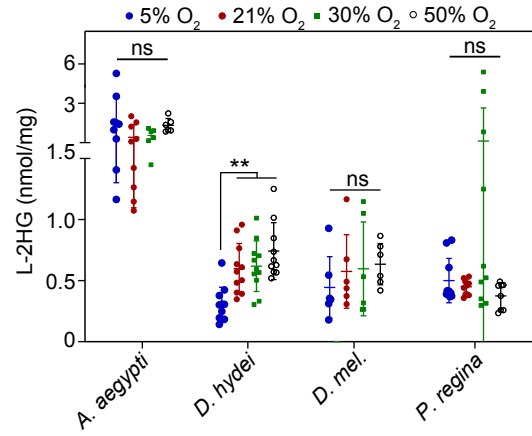

**Figure 3. Larval L-2HG levels do not change in response to mild hypoxia or hyperoxia.** L-2HG levels were measured in select Dipteran larvae following a 24-hour incubation in the presence of 5%, 21%, 30% or 50% O<sub>2</sub>. Data are presented in scatter plots with mean ± SD. \*\*P<0.01; See Supplemental Methods for a description of the statistical analysis.

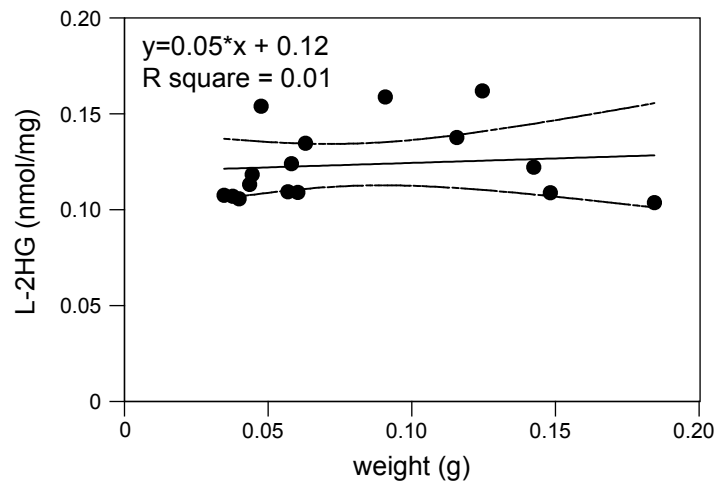

**Figure S1.** Concentration of L-2HG relative to body mass in *M. sexta* third instar larvae. Data are presented as a scatter plot. Each data point represents an individual larva. Dashed lines represent the 95% confidence interval.
